# Supplementary material for: Regularity and mechanism of fake crackle noise in an electronic stethoscope
Source: Front Physiol. 2022 Dec 12;13:1079468. doi: 10.3389/fphys.2022.1079468 (PMC9791113; doi:10.3389/fphys.2022.1079468)
Supplement: Supplementary file 1 [file Table1.XLS]

## Sheet: Sheet1
The minimum and maximum frequency of each fake crackle audio recording
Subject No.	Location	Min Frequency（Hz）	Max Frequency（Hz）
1	R3	900	1650
2	R1	600	1250
2	R3	550	1600
2	L1	550	1700
2	L4	550	1550
4	R3	600	1550
5	R3	350	1550
6	R3	400	1750
6	L1	250	1850
6	L4	550	1550
8	R1	450	1700
8	R2	500	1600
8	L3	600	1800
9	R3	350	1750
12	R3	500	1650
13	L3	450	1750
15	R3	400	1550
15	L3	550	1650
16	R3	550	1550
16	L1	550	1650
16	L4	550	1600
17	R3	450	1800
17	L3	600	1700
19	R1	300	1800
19	L1	500	1700
20	R1	600	1550
20	L1	500	1650
22	L3	500	1500
23	R4	600	1400
28	L2	600	1550
29	R3	600	1750
29	R4	1150	1600
29	L4	850	1400
30	T	550	1700
30	L2	500	1800
30	L3	600	1650
31	L3	450	1350
35	T	250	1950
36	L3	400	1500
37	R4	450	1300
38	L2	850	1600
38	L3	500	1550
40	T	550	1550
40	L2	550	1300
41	R3	550	1450
41	R4	550	1400
42	T	400	1700
42	R2	450	1550
42	R3	600	1500
43	R4	550	1450
45	R2	850	1300
48	L3	350	1050
50	T	450	1600
50	L4	300	1550
50	L1	450	1550
51	R4	400	1600
51	L4	450	1650
52	R3	450	1500
52	L1	500	1450
55	R2	900	1350
55	L3	550	1400
